# Supplementary material for: Fast responding and selective near-IR Bodipy dye for hydrogen sulfide sensing
Source: Royal Society of Chemistry journal article supplement (doi:10.1039/c4cc00762j), 2014-01-01
Supplement: c4cc00762j1.pdf [file c4cc00762j1.pdf]

## SUPPORTING INFORMATION

# Fast Responding and Selective Near-IR Bodipy Dye for Hydrogen Sulfide Sensing

Tugba Ozdemir,<sup>†</sup> Fazli Sozmen,<sup>†</sup> Sevcan Mamur,<sup>‡</sup> Turgay Tekinay<sup>‡</sup> and Engin U. Akkaya<sup>\*,†,§</sup>

<sup>†</sup>UNAM-National Nanotechnology Research Center and <sup>‡</sup> Life Sciences Practice and Research Center, Gazi University, Ankara, 06500, Turkey. <sup>§</sup> Department of Chemistry, Bilkent University, 06800 Ankara, Turkey.

\*eua@fen.bilkent.edu.tr

### Contents:

|                                                                          |    |
|--------------------------------------------------------------------------|----|
| 1. Experimental Section.....                                             | S2 |
| 2. <sup>1</sup> H, <sup>13</sup> C NMR and Mass Spetra of compounds..... | S6 |

## Supporting Information

### EXPERIMENTAL PROCEDURES

General:  $^1\text{H}$  NMR and  $^{13}\text{C}$  NMR spectra were recorded on Bruker DPX-400 (operating at 400 MHz for  $^1\text{H}$  NMR and 100 MHz for  $^{13}\text{C}$  NMR) in  $\text{CDCl}_3$  with tetramethylsilane as internal standard. All spectra were recorded at  $25^\circ\text{C}$  and coupling constants ( $J$  values) are given in Hz. Chemical shifts are given in parts per million (ppm). Absorption spectra were performed by using a Varian Cary-100 spectrophotometer. Fluorescence measurements were conducted on a Varian Eclipse spectrofluorometer. Mass spectra were recorded on Agilent Technologies 6530 Accurate-Mass Q-TOF LC/MS. Reactions were monitored by thin layer chromatography using Merck TLC Silica gel 60 F254. Silica gel column chromatography was performed over Merck Silica gel 60 (particle size: 0.040-0.063 mm, 230-400 mesh ASTM). Compound **4** was synthesized according to literature.<sup>1</sup> All other reagents and solvents were purchased from Aldrich and used without further purification.

### Synthesis of **3**:

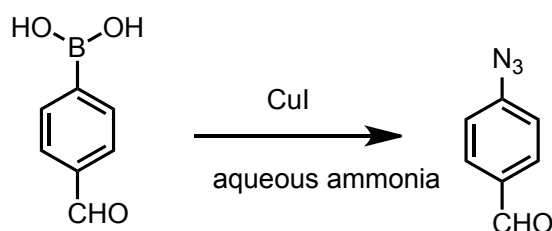

Compound **3** was synthesized according to literature with slight modifications.<sup>2</sup> CuI (95 mg, 0.5 mmol), 25% aqueous ammonia (0.95 mL, 12.5 mmol of  $\text{NH}_3$ ), and water (2.5 mL) were stirred in a round bottomed flask at room temperature. After 30 min., 4-formylphenylboronic acid (**2**) (745 mg, 5 mmol),  $\text{NaN}_3$  (1,625 g, 25 mmol), and water (5.5 mL) were added to the reaction mixture. The solution was stirred for 24 h at room temperature in an open atmosphere to allow the air to get into the reaction medium. Aqueous NaOH (2N, 7.5 ml) was added and extraction was performed with ethylacetate three times. Organic phase was gathered, dried over  $\text{Na}_2\text{SO}_4$  and evaporated in vacuo. Column chromatography was performed using with the eluant DCM: Hexane (1:1) to get the desired product.

$^1\text{H}$  NMR (400 MHz, Chloroform-*d*)  $\delta$  9.92 (s, 1H), 7.86 (d,  $J = 8.5$  Hz, 1H), 7.13 (d,  $J = 8.5$  Hz, 1H).

$^{13}\text{C}$  NMR (100 MHz, Chloroform-*d*)  $\delta$  190.56, 146.28, 133.26, 131.54, 119.49.

## Synthesis of 5:

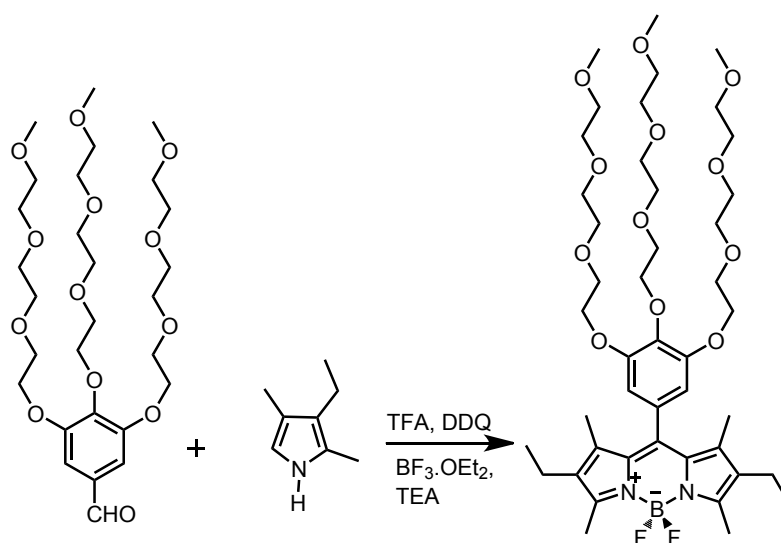

Compound 4 (0.6 g, 1.01 mmol) was dissolved in 400 mL Ar-degassed DCM in a 1 L round bottom flask and 2,4-dimethyl-3-ethyl-pyrrole (0.3 mL, 2.22 mmol) was added. This was followed by the addition of 1-2 drops of TFA. The mixture was stirred about 3 hrs at room temperature. After TLC showed no starting material, p-chloroanil (297 mg, 1.21 mmol) was poured into the reaction vessel. After 1 hr stirring, 6 mL TEA was added dropwise to the solution over a period of 5 min. The color turned out to be brown and it was stirred for an additional 30 min. Lastly, 6 mL BF<sub>3</sub>.OEt<sub>2</sub> was added to the reaction in a dropwise manner over a period of 5 min, as well. The mixture was left to stir overnight at room temperature. Extraction was performed with water (3x300 mL) and the organic layer was dried over anhydrous Na<sub>2</sub>SO<sub>4</sub>. After concentrating the organic layer in vacuo, it was purified by flash column chromatography with the eluant 5% TEA: DCM. The product was obtained as red solid (367 mg, 42%).

<sup>1</sup>H NMR (400 MHz, Chloroform-*d*) δ 6.56 (s, 2H), 4.24 (t, *J* = 5.0 Hz, 2H), 4.15 – 4.05 (m, 4H), 3.85 (t, *J* = 5.0 Hz, 4H), 3.79 – 3.48 (m, 26H), 3.40 (s, 3H), 3.37 (s, 6H), 2.54 (s, 6H), 2.31 (dd, *J* = 9.5, 5.2 Hz, 4H), 1.43 (s, 6H), 1.01 (t, *J* = 7.3 Hz, 6H).

## Synthesis of 1:

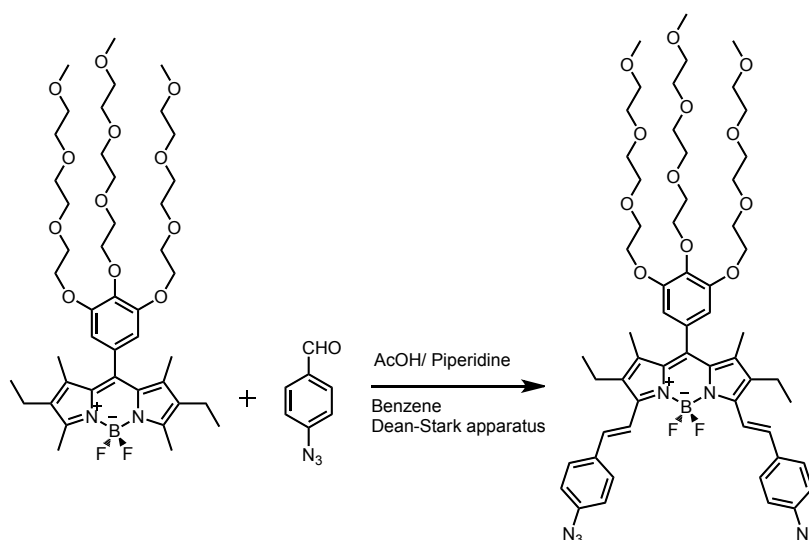

In a 100 mL round-bottomed flask containing 50 mL benzene, Compound 5 (150 mg, 0.17 mmol) and 4-azidobenzaldehyde (56 mg, 0.38 mmol), piperidine (0.3 mL) and acetic acid (0.3 mL) were added. The mixture was heated under reflux by using a Dean Stark trap and progress of the reaction was monitored by TLC. When all the starting material had been consumed, the mixture was cooled to room temperature and solvent was evaporated. Water (100 mL) added to the residue and the product was extracted into the DCM (2 x 100 mL). Organic phase was dried over  $\text{Na}_2\text{SO}_4$ , evaporated and residue was purified by silica gel column chromatography using DCM as the eluant. (67 mg, 35%).

$^1\text{H}$  NMR (400 MHz, Chloroform-*d*)  $\delta$  7.73 (d,  $J = 16.6$  Hz, 2H), 7.62 (d,  $J = 8.6$  Hz, 4H), 7.22 (d,  $J = 16.8$  Hz, 2H), 7.07 (d,  $J = 8.5$  Hz, 4H), 6.59 (s, 2H), 4.26 (dd,  $J = 5.8, 3.9$  Hz, 2H), 4.15 (dd,  $J = 5.8, 3.8$  Hz, 4H), 3.87 (t,  $J = 4.8$  Hz, 4H), 3.80 – 3.44 (m, 26H), 3.40 (s, 3H), 3.36 (s, 6H), 2.67 – 2.59 (m, 4H), 1.49 (s, 6H), 1.19 (t,  $J = 7.6$  Hz, 6H).

$^{13}\text{C}$  NMR (100 MHz,  $\text{CDCl}_3$ )  $\delta$  153.90, 153.83, 140.01, 138.98, 134.66, 134.27, 133.98, 128.95, 128.77, 127.50, 124.19, 119.55, 119.39, 108.25, 72.77, 71.92, 70.88, 70.72, 70.66, 70.57, 69.76, 69.26, 58.99, 18.36, 14.02, 11.46, 1.00.

Calcd: 1147.54  $[\text{M}+\text{Na}]^+$ , Found: 1147.528  $[\text{M}+\text{Na}]^+$ ,  $\Delta=10.45$  ppm.

### NMR Data of Compound **1** after addition the addition of Na<sub>2</sub>S:

<sup>1</sup>H NMR (400 MHz, CD<sub>3</sub>CN) δ 7.53 (d, *J* = 16.6 Hz, 2H), 7.43 (d, *J* = 8.5 Hz, 4H), 7.28 (d, *J* = 16.7 Hz, 2H), 6.73 (d, *J* = 7.5 Hz, 6H), 4.56 (d, *J* = 9.1 Hz, 2H), 4.25 – 4.20 (m, 4H), 4.19 – 4.11 (m, 4H), 3.87 – 3.43 (m, 26H), 3.34 (s, 3H), 3.31 (s, 6H), 2.69 (m, 4H), 1.54 (s, 6H), 1.18 (t, *J* = 7.4 Hz, 6H).

### UV-Vis Titration Experiments:

Titration of probe **1** with Na<sub>2</sub>S: 60 μL portions of 100 μM stock solution of probe **1** in acetonitrile were added aliquots of 20 mM Na<sub>2</sub>S solutions (in 20 mM HEPES, pH=7.20, 25 °C), (30, 15, 7.5, 3, 1.5, 0.75 μL). Volumes of these solutions were adjusted to 3 mL (HEPES:CH<sub>3</sub>CN, 40:60, v/v). UV-vis absorption spectra were recorded at room temperature.

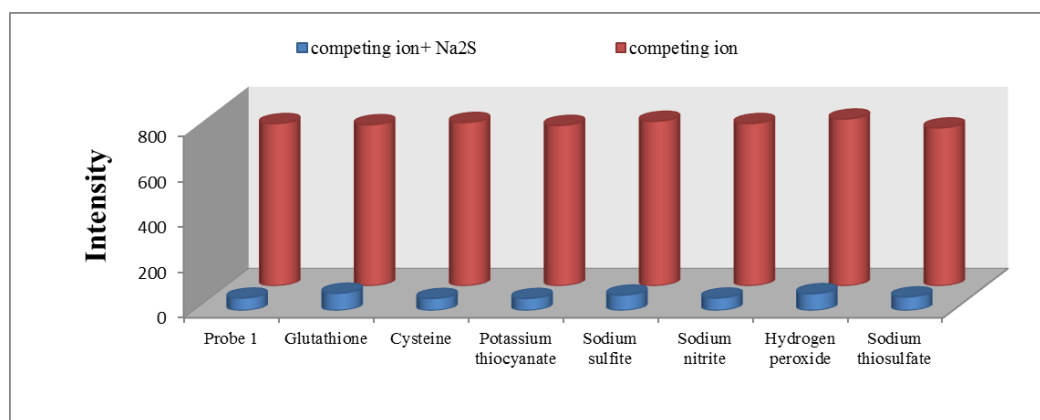

Figure S1. Emission intensity response of probe **1** (2.0 μM) with 50 equiv. of a competing anions followed by addition of 50 equiv. Na<sub>2</sub>S in 20 mM HEPES:CH<sub>3</sub>CN (40:60, v/v, pH=7.20, 25 °C). Excitation wavelength was 650 nm with a slit width of 5-5 nm.

### Detection Limit:

Fluorescence titrations were employed to determine detection limit of probe **1**. According to reported method<sup>3,4</sup>, by measuring of emission intensity of probe **1** in absence of Na<sub>2</sub>S by 7 times, standard deviation of blank measurements were recorded. A linear relationship between the fluorescence intensity and Na<sub>2</sub>S concentration was acquired and according to equation,

$$\text{detection limit} = 3s/m,$$

where *s* is the standard deviation of 7 blank measures, *m* is the slope of emission intensity versus Na<sub>2</sub>S concentration graph. This calculation gives the detection limit of probe **1** as 0.34 μM.

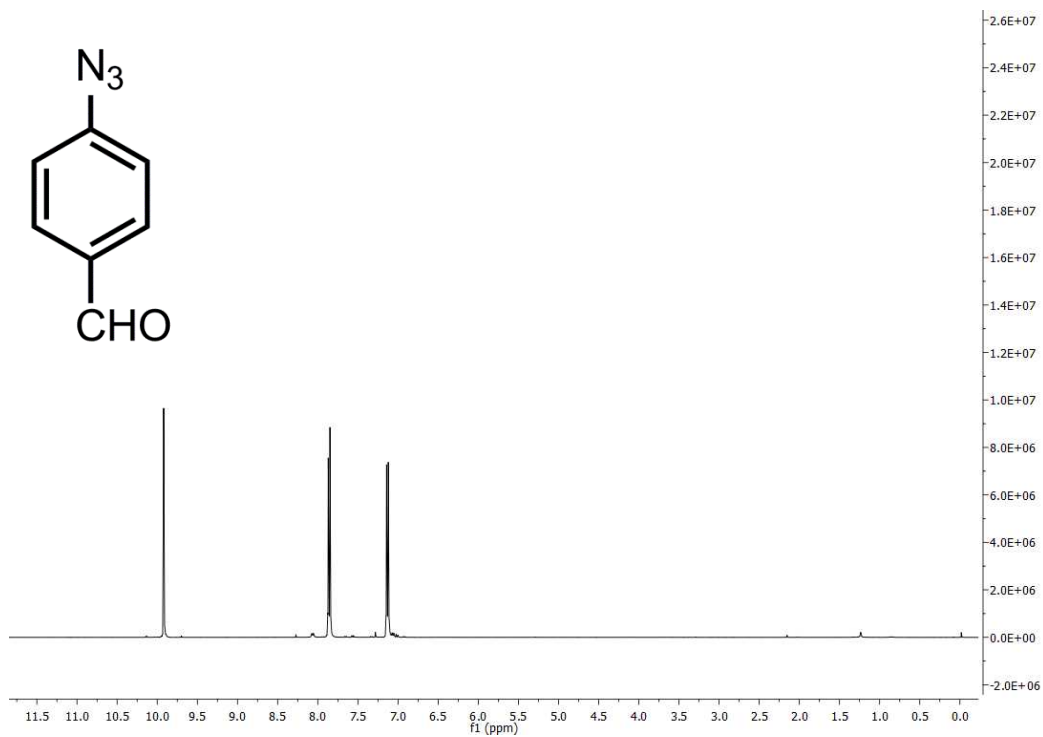

Figure S2: <sup>1</sup>H NMR spectrum of Compound 3

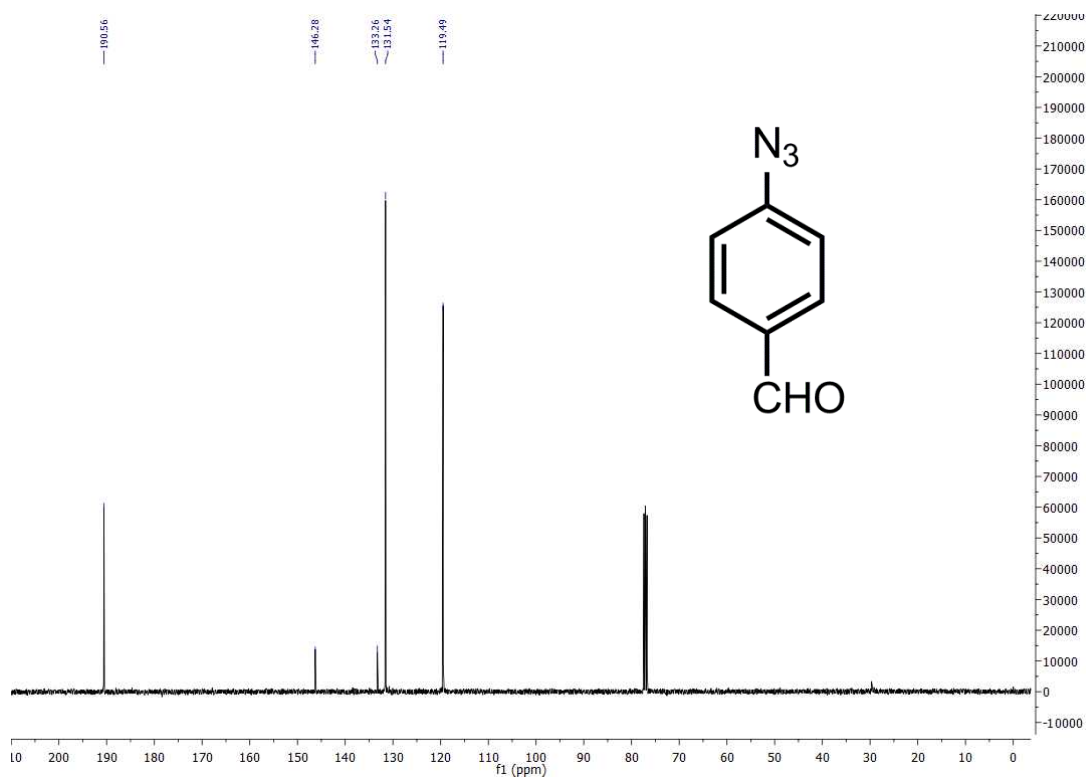

Figure S3: <sup>13</sup>C NMR spectrum of Compound 3

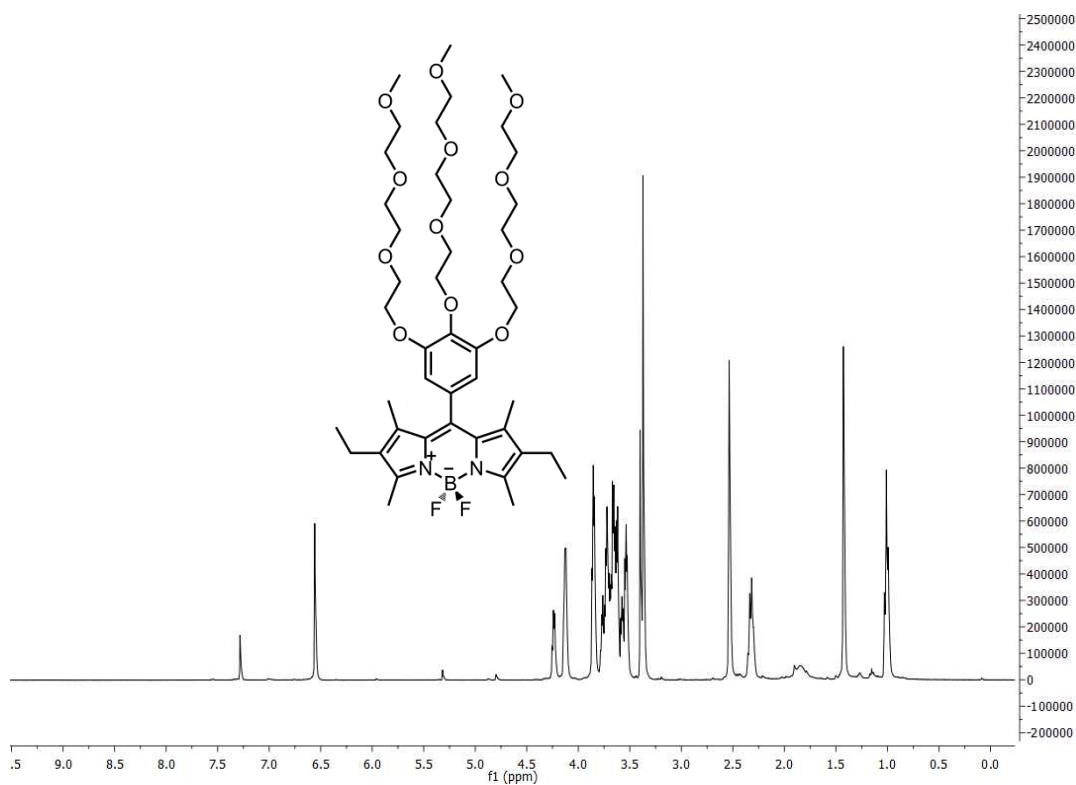

Figure S4:  $^1\text{H}$  NMR spectrum of Compound **5**

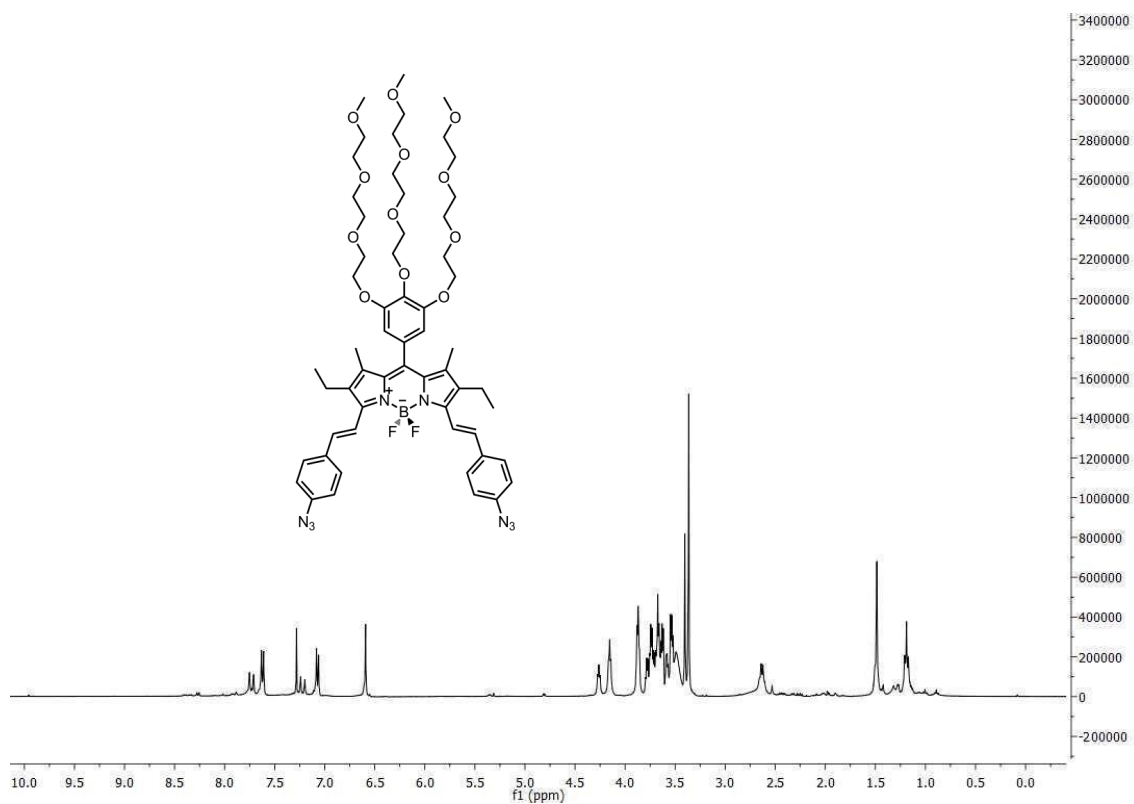

Figure S5:  $^1\text{H}$  NMR spectrum of Compound **1**

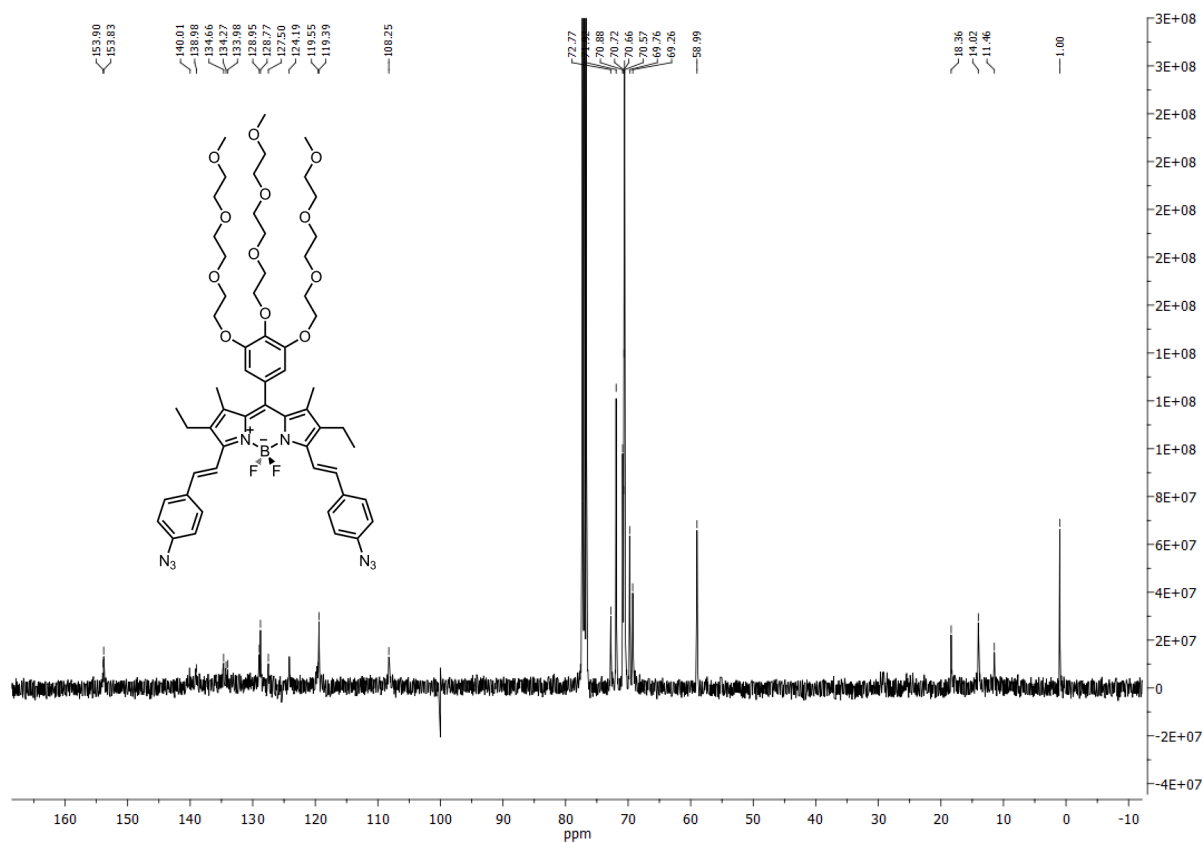

Figure S6: <sup>13</sup>C NMR spectrum of Compound 1

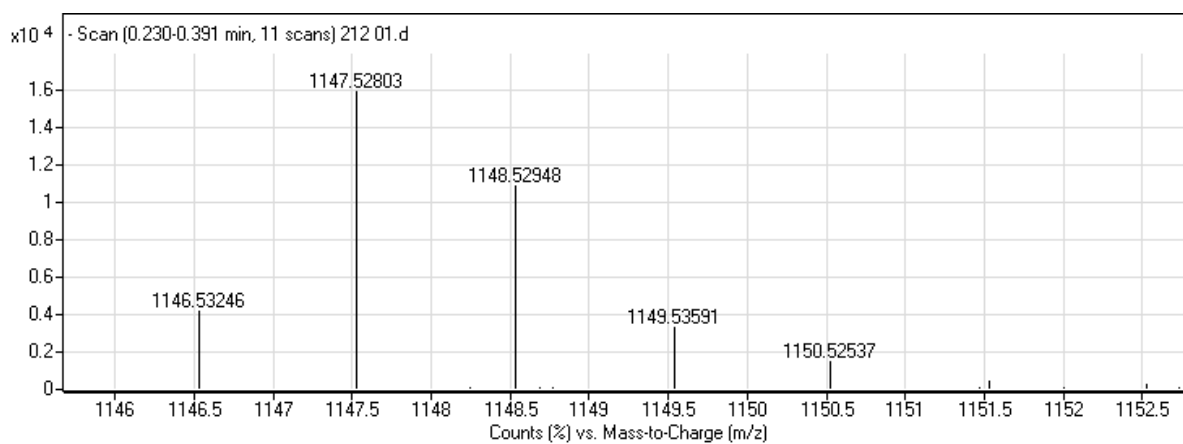

Figure S7: Mass spectrum of Compound 1



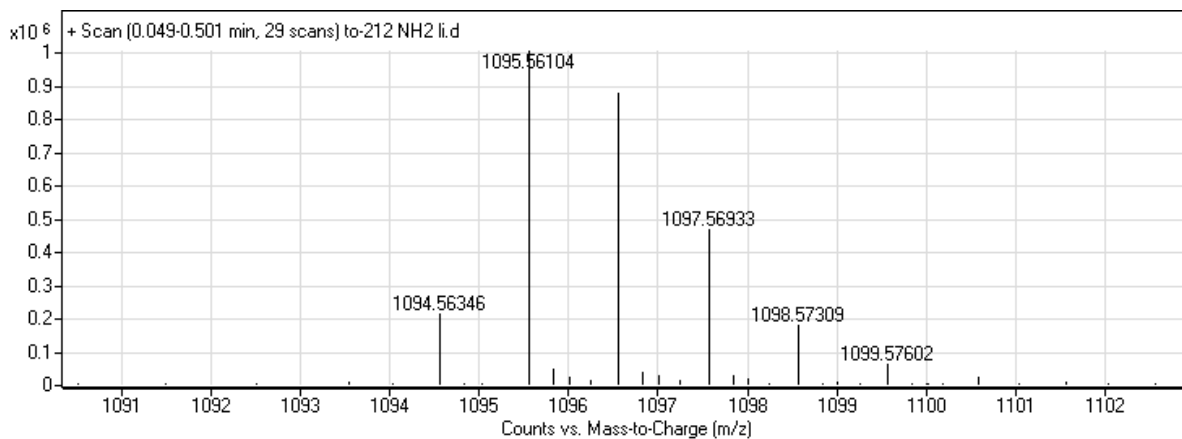

Figure S8: Mass spectrum of Compound **1** after addition the addition of Na<sub>2</sub>S (Calcd: 1094.568 [M+Na]<sup>+</sup>, Found: 1094.563 [M+Na]<sup>+</sup>, Δ=4.52 ppm.)

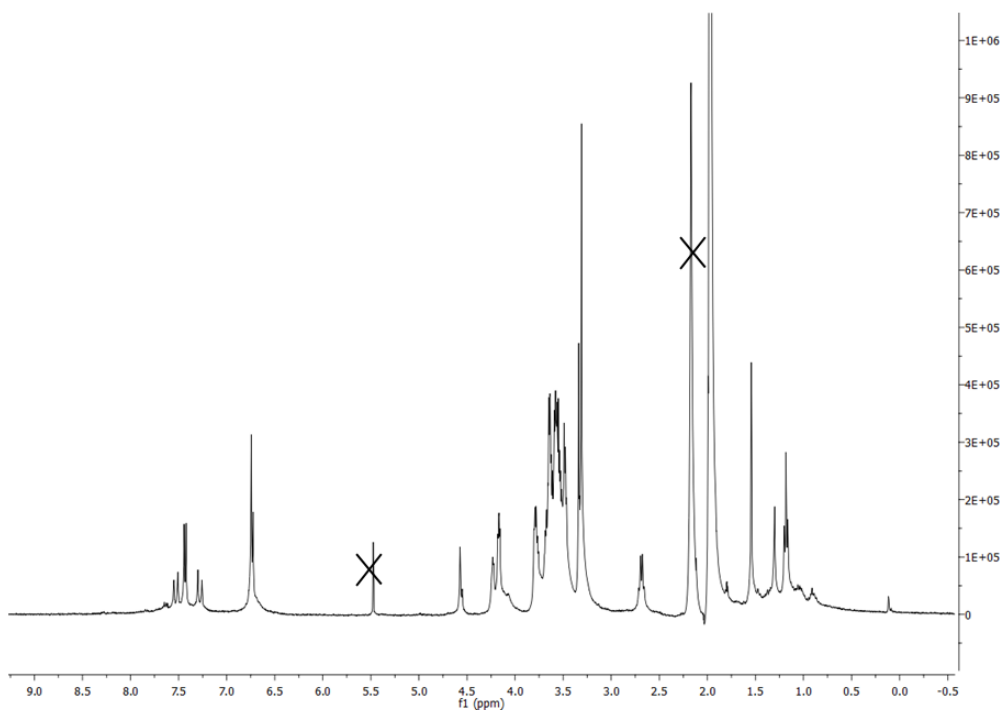

Figure S9: <sup>1</sup>H NMR spectrum of Compound **1** after addition the addition of Na<sub>2</sub>S.

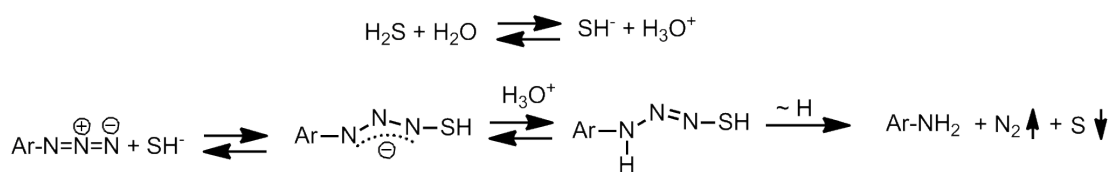

Figure S10: Proposed mechanism for reduction of azide group to amine group.<sup>5</sup>

## References:

- 1) S. Atilgan, T. Ozdemir and E. U. Akkaya, *Org. Lett.*, 2008, **10**, 4065.
- 2) H. Yang, Y. Li, M. Jiang, J. Wang and H. Fu, *Chem. Eur. J.* 2011, **17**, 5652.
- 3) T. Saha, D. Kand and P. Talukdar, *Org. Biomol. Chem.*, 2013, **11**, 8166.
- 4) R. Wang, F. Yu, L. Chen, H. Chen, L. Wang and W. Zhang, *Chem. Commun.*, 2012, **48**, 11757.
- 5) S. Gronowitz, C. Westerlund and A. B. Hornfeldt, *Acta Chem. Scand., Ser. B* 1975, **B29**, 224.
